# Supplementary material for: Chemical modification utilizing a terminal structure exposed on the specific surface of polymer-metal complex nanocrystals
Source: Royal Society of Chemistry journal article supplement (doi:10.1039/c9ra10244b), 2020-01-01
Supplement: c9ra10244b1.pdf [file c9ra10244b1.pdf]

## Supplementary information

Table S1. Luminescence quantum yields ( $\Phi$ ) of PMC NCs reacted with alkyl iodides having different alkyl chain length.

| alkyl iodides | Luminescence quantum yields of PMC NCs ( $\Phi$ ) |
|---------------|---------------------------------------------------|
| methyl iodide | 40%                                               |
| ethyl iodide  | 24%                                               |
| butyl iodide  | 18%                                               |
| octyl iodide  | 15%                                               |
